# Supplementary material
Source: HighWire-hosted journal article supplement (https://gut.bmj.com/content/72/9/1738)
Supplement: inline-supplementary-material-1 [file inline-supplementary-material-1.pdf]

## Suppl. Methods and Results

### Definition of age-dependent reference values for the diameter of the common bile duct and pancreatic duct on MRCP: a population-based, cross-sectional, cohort study

Georg Beyer<sup>1#</sup>, Florian Kasprovicz<sup>1,2#</sup>, Anke Hannemann<sup>3,4</sup>, Ali A. Aghdassi<sup>2</sup>, Patrick Thamm<sup>5</sup>, Henry Völzke<sup>4,6</sup>, Markus M. Lerch<sup>1,2</sup>, Jens P. Kühn<sup>5,7</sup>, Julia Mayerle<sup>1,2</sup>

<sup>1</sup> Department of Medicine II, University Hospital, Ludwig-Maximilians-University Munich, Germany; <sup>2</sup> Department of Medicine A; University Medicine, University of Greifswald, Germany; <sup>3</sup> Institute of Clinical Chemistry and Laboratory Medicine, University Medicine, University of Greifswald, Germany; <sup>4</sup> German Centre for Cardiovascular Research (DZHK), Partner Site Greifswald, University Medicine, Greifswald, Germany; <sup>5</sup> Institute of Diagnostic Radiology and Neuroradiology, University Medicine, University of Greifswald, Germany; <sup>6</sup> Institute for Community Medicine, Clinical Epidemiology, University Medicine, University of Greifswald, Germany; <sup>7</sup> Institute of Diagnostic Radiology, University Medicine, Carl Gustav Carus University Dresden, Germany

# GB and FK contributed equally to this work.

### Corresponding Author

Prof. Dr. Julia Mayerle

Department of Medicine

University Hospital

LMU Munich

Marchioninstr. 15

81377 Munich

Germany

Telefon: +49 89 4400 72391

Fax: +49 89 4400 78887

Email: [julia.mayerle@med.uni-muenchen.de](mailto:julia.mayerle@med.uni-muenchen.de)

## Suppl. Methods

### Study population

Baseline examinations in the SHIP-Start cohort (SHIP-Start-0) were conducted between 1997 and 2001 in 4,308 inhabitants of the study region West Pomerania. All participants from SHIP-Start-0 were invited to participate in four follow-ups (SHIP-Start-1 to SHIP-Start-4). Baseline examinations in the SHIP-Trend cohort (SHIP-Trend-0), an independent population-based cohort in the same study region, were conducted between 2008 and 2012 in 4,420 subjects.

Of the initial 4,308 SHIP-Start-0 participants, 2,333 subjects agreed to participate in SHIP-Start-2. SHIP-Trend-0 recruited a total of 4,420 subjects [1]. In SHIP-Start-2 and SHIP-Trend-0, that represent the baseline of the study presented here, MRI and MRCP were performed upon informed consent [2, 3] and a total of 3,369 participants eventually underwent wholebody MRI [3]. The follow-up data presented here is based on SHIP-Start-3 and SHIP-Trend-1 data. SHIP-Start-3 started in 2014 and finished in 2016, while SHIP-Trend-1 started in 2016 and finished in 2019. Of the 1,018 subjects included in the cross-sectional analyses, 40 died and 191 were lost to follow-up, leaving 787 with sufficient follow-up data available. For details, please see **Figure 1** and **suppl. Figure 1**.

### *MR Technique, Study Medication and Protocol for Incidental Findings*

We used a 1.5-T MRI system (Magnetom Avanto, Siemens Healthcare). The MRCP (navigator-triggered T2-weighted 3D turbo spin-echo) included an automatic maximum-intensity-projection (MIP) reconstruction in the coronal orientation using the following imaging parameters: TR, approximately 900 ms; long TE, 742 ms; bandwidth, 260 Hz/pixel; matrix, 384 × 384; number of slices, 44; and slice thickness 1.5 mm. The acquisition for MRCP varied between 2 to 6 minutes depending on subject size. For those receiving secretin, an unstimulated MRCP was obtained first, followed by a scan after secretin administration (Secrelux®, Sanochemia Pharmazeutika AG) in the same orientation. Secretin was administered at 1 U/kg of body weight, slow injection over 60 seconds and was followed by a 20-mL saline flush as described previously.[2, 4, 5]

For MRI examinations an additional consent form was developed in which the study participant could opt for a full report of all findings, decline any information on the findings or only being informed about potentially life threatening findings. All incidental findings were discussed by a multidisciplinary advisory board and in case follow up investigations were recommended and the study participant had opted to be informed on the findings, the participant and primary

physician were contacted to pursue further diagnostic work-up, however the results of such work-up were not available for analysis.[6] This strategy has been adopted by the German national cohort study.[7] A relevant negative effect of this strategy on mental health of the study participants has been excluded.[8] A full list of data available from SHIP cohorts including MRI-data can be found here: [https://www.fvcm.med.uni-greifswald.de/dd\\_service/data\\_use\\_explore.php?lang=ger](https://www.fvcm.med.uni-greifswald.de/dd_service/data_use_explore.php?lang=ger), a full report on study related examinations has been reported elsewhere. [9]

### *Laboratory Analyses*

Serum activities of alanine aminotransferase (ALAT), aspartate aminotransferase (ASAT), gamma glutamyl transferase (GGT), amylase, and lipase were determined photometrically on the Dimension VISTA (Siemens Healthcare Diagnostics, Eschborn, Germany) in SHIP-Start-2 and SHIP-Trend-0.

### *Statistical Analysis*

Data documentation and statistical analyses were performed using IBM SPSS Statistics (Versions 23 - 25 for Windows) and SAS 9.4 (SAS Institute Inc., Cary, North Carolina, USA).

Demographics of the study population are reported as medians with first and third quartiles or proportions. Duct diameters in the examined subgroups, i.e. with and without secretin and for selected age groups are given as medians with interquartile range. In multivariable quantile regression models, the relation of age, sex, BMI and alanine aminotransferase (ALAT) activity and median CBD or PD diameters was assessed. From these regression models the beta-coefficients, 95% confidence intervals and the p-values are reported. Moreover, the associations between BMI and ALAT with median CBD and PD diameters were visualized in scatterplots together with the original measured values.

Wilcoxon-Mann Whitney tests were used to inspect differences in native CBD and PD diameters between men and women and to inspect differences between healthy subjects and those with cholecystectomy. Duct diameters before and after secretin administration were compared using Wilcoxon signed rank sum tests. Statistical significance was assumed at a p value of  $\leq .01$  if not stated otherwise.

Age-dependent upper limits of normal duct diameters were determined with non-parametric quantile regression.[10] We defined the 95<sup>th</sup> percentile as upper limit of normal and determined respective normative values for each single year of age. Subsequently, upper limits of normal for the whole cohort, for subjects < 65 years and subjects  $\geq 65$  years as well as according to age decades were calculated and reported. Additionally, we illustrated the upper limits of

normal for the CBD and PD diameter together with the median, the original measured values and the conventional upper limit of normal in scatterplots. In a sensitivity analysis upper limits of normal were recalculated after exclusion of subjects who died, were lost-to-follow-up or who had developed incident pancreatic cancer or liver lesions.

Reliability of MRI readings was assured by analyzing intra-class correlation (ICC) using two-way mixed effect models testing for consistency for inter-rater reliability and absolute agreement for intra-rater reliability. ICC and Cronbach's alpha above .8 were considered acceptable [11].

**Suppl. References:**

- 1 Laugisch O, Holtfreter B, Pink C, Samietz S, Volzke H, Kocher T. Polypharmacy and saliva volumes in the northeast of Germany - The Study of Health in Pomerania. *Community Dent Oral Epidemiol* 2021.
- 2 Hegenscheid K, Kuhn JP, Volzke H, Biffar R, Hosten N, Puls R. Whole-body magnetic resonance imaging of healthy volunteers: pilot study results from the population-based SHIP study. *Rofo* 2009;**181**:748-59.
- 3 Kromrey ML, Bulow R, Hubner J, Paperlein C, Lerch MM, Ittermann T, *et al.* Prospective study on the incidence, prevalence and 5-year pancreatic-related mortality of pancreatic cysts in a population-based study. *Gut* 2018;**67**:138-45.
- 4 Bulow R, Simon P, Thiel R, Thamm P, Messner P, Lerch MM, *et al.* Anatomic variants of the pancreatic duct and their clinical relevance: an MR-guided study in the general population. *Eur Radiol* 2014;**24**:3142-9.
- 5 Mensel B, Messner P, Mayerle J, Fluhr G, Volzke H, Lerch MM, *et al.* Secretin-stimulated MRCP in volunteers: assessment of safety, duct visualization, and pancreatic exocrine function. *AJR Am J Roentgenol* 2014;**202**:102-8.
- 6 Hegenscheid K, Seipel R, Schmidt CO, Volzke H, Kuhn JP, Biffar R, *et al.* Potentially relevant incidental findings on research whole-body MRI in the general adult population: frequencies and management. *Eur Radiol* 2013;**23**:816-26.
- 7 Bamberg F, Kauczor HU, Weckbach S, Schlett CL, Forsting M, Ladd SC, *et al.* Whole-Body MR Imaging in the German National Cohort: Rationale, Design, and Technical Background. *Radiology* 2015;**277**:206-20.
- 8 Schmidt CO, Sierocinski E, Hegenscheid K, Baumeister SE, Grabe HJ, Volzke H. Impact of whole-body MRI in a general population study. *Eur J Epidemiol* 2016;**31**:31-9.
- 9 Volzke H, Schossow J, Schmidt CO, Jurgens C, Richter A, Werner A, *et al.* Cohort Profile Update: The Study of Health in Pomerania (SHIP). *Int J Epidemiol* 2022.
- 10 Koenker R. *Quantile Regression*: Cambridge University Press, 2005.
- 11 Koo TK, Li MY. A Guideline of Selecting and Reporting Intraclass Correlation Coefficients for Reliability Research. *J Chiropr Med* 2016;**15**:155-63.
- 12 Govindan S, Tamrat NE, Liu ZJ. Effect of Ageing on the Common Bile Duct Diameter. *Dig Surg* 2021;**38**:368-76.
- 13 Karamanos E, Inaba K, Berg RJ, Resnick S, Okoye O, Alexopoulos S, *et al.* The Relationship between Age, Common Bile Duct Diameter and Diagnostic Probability in Suspected Choledocholithiasis. *Dig Surg* 2017;**34**:421-8.
- 14 Peng R, Zhang L, Zhang XM, Chen TW, Yang L, Huang XH, *et al.* Common bile duct diameter in an asymptomatic population: A magnetic resonance imaging study. *World J Radiol* 2015;**7**:501-8.
- 15 McArthur TA, Planz V, Fineberg NS, Berland LL, Lockhart ME. CT evaluation of common duct dilation after cholecystectomy and with advancing age. *Abdom Imaging* 2015;**40**:1581-6.
- 16 Benjaminov F, Leichtman G, Naftali T, Half EE, Konikoff FM. Effects of age and cholecystectomy on common bile duct diameter as measured by endoscopic ultrasonography. *Surg Endosc* 2013;**27**:303-7.
- 17 Chen T, Hung CR, Huang AC, Lii JM, Chen RC. The diameter of the common bile duct in an asymptomatic Taiwanese population: measurement by magnetic resonance cholangiopancreatography. *J Chin Med Assoc* 2012;**75**:384-8.
- 18 Itoi T, Kamisawa T, Fujii H, Inui K, Maguchi H, Hamada Y, *et al.* Extrahepatic bile duct measurement by using transabdominal ultrasound in Japanese adults: multi-center prospective study. *J Gastroenterol* 2013;**48**:1045-50.
- 19 Senturk S, Miroglu TC, Bilici A, Gumus H, Tekin RC, Ekici F, *et al.* Diameters of the common bile duct in adults and postcholecystectomy patients: a study with 64-slice CT. *Eur J Radiol* 2012;**81**:39-42.
- 20 McArthur TA, Planz V, Fineberg NS, Tessler FN, Robbin ML, Lockhart ME. The common duct dilates after cholecystectomy and with advancing age: reality or myth? *J Ultrasound Med* 2013;**32**:1385-91.
- 21 Park JS, Lee DH, Jeong S, Cho SG. Determination of Diameter and Angulation of the Normal Common Bile Duct using Multidetector Computed Tomography. *Gut Liver* 2009;**3**:306-10.
- 22 Chawla S, Trick WE, Gilkey S, Attar BM. Does cholecystectomy status influence the common bile duct diameter? A matched-pair analysis. *Dig Dis Sci* 2010;**55**:1155-60.

- 23 Bachar GN, Cohen M, Belenky A, Atar E, Gideon S. Effect of aging on the adult extrahepatic bile duct: a sonographic study. *Journal of ultrasound in medicine : official journal of the American Institute of Ultrasound in Medicine* 2003;**22**:879-85.
- 24 Horrow MM, Horrow JC, Niakosari A, Kirby CL, Rosenberg HK. Is age associated with size of adult extrahepatic bile duct: sonographic study. *Radiology* 2001;**221**:411-4.
- 25 Kaim A, Steinke K, Frank M, Enriquez R, Kirsch E, Bongartz G, *et al.* Diameter of the common bile duct in the elderly patient: measurement by ultrasound. *European radiology* 1998;**8**:1413-5.
- 26 Feng B, Song Q. Does the common bile duct dilate after cholecystectomy? Sonographic evaluation in 234 patients. *AJR American journal of roentgenology* 1995;**165**:859-61.
- 27 Wu CC, Ho YH, Chen CY. Effect of aging on common bile duct diameter: a real-time ultrasonographic study. *J Clin Ultrasound* 1984;**12**:473-8.
- 28 Niederau C, Müller J, Sonnenberg A, Scholten T, Erckenbrecht J, Fritsch WP, *et al.* Extrahepatic bile ducts in healthy subjects, in patients with cholelithiasis, and in postcholecystectomy patients: a prospective ultrasonic study. *J Clin Ultrasound* 1983;**11**:23-7.
- 29 Frokjaer JB, Olesen SS, Drewes AM, Collins D, Akisik F, Swensson J. Impact of age on the diagnostic performance of pancreatic ductal diameters in detecting chronic pancreatitis. *Abdom Radiol (NY)* 2020;**45**:1488-94.
- 30 Wang Q, Swensson J, Hu M, Cui E, Tirkes T, Jennings SG, *et al.* Distribution and correlation of pancreatic gland size and duct diameters on MRCP in patients without evidence of pancreatic disease. *Abdom Radiol (NY)* 2019;**44**:967-75.
- 31 Testoni PA, Mariani A, Curioni S, Giussani A, Masci E. Pancreatic ductal abnormalities documented by secretin-enhanced MRCP in asymptomatic subjects with chronic pancreatic hyperenzymemia. *Am J Gastroenterol* 2009;**104**:1780-6.
- 32 Glaser J, Stienecker K. Pancreas and aging: a study using ultrasonography. *Gerontology* 2000;**46**:93-6.
- 33 Hastier P, Buckley MJ, Dumas R, Kuhdorf H, Staccini P, Demarquay JF, *et al.* A study of the effect of age on pancreatic duct morphology. *Gastrointestinal endoscopy* 1998;**48**:53-7.
- 34 Anand BS, Vij JC, Mac HS, Chowdhury V, Kumar A. Effect of aging on the pancreatic ducts: a study based on endoscopic retrograde pancreatography. *Gastrointestinal endoscopy* 1989;**35**:210-3.
- 35 Bolondi L, Gaiani S, Gullo L, Labò G. Secretin administration induces a dilatation of main pancreatic duct. *Digestive diseases and sciences* 1984;**29**:802-8.
- 36 Sivak MV, Jr., Sullivan BH, Jr. Endoscopic retrograde pancreatography: analysis of the normal pancreatogram. *Am J Dig Dis* 1976;**21**:263-9.

**Suppl. Table 1:** Characteristics of the excluded subjects

| Characteristics                               | Exclusions<br>n=115 |
|-----------------------------------------------|---------------------|
| Male, %                                       | 47.8                |
| Reason for exclusion*                         |                     |
| Cholecystolithiasis or<br>choledocholithiasis | 47                  |
| Chronic pancreatitis                          | 14                  |
| Cystic pancreatic lesions                     | 52                  |
| Acute/chronic liver disease**                 | 14                  |
| Previous pancreatic or liver<br>resection     | 0                   |
| Tumors of upper abdomen                       | 0                   |
| Age, years                                    | 63.0 (55.0 - 70.0)  |
| BMI, kg/m <sup>2</sup>                        | 27.5 (25.2 - 30.2)  |
| ALAT, $\mu$ ktatal/l                          | 0.38 (0.29 - 0.55)  |
| ASAT, $\mu$ ktatal/l                          | 0.32 (0.27 - 0.41)  |
| GGT, $\mu$ ktatal/l                           | 0.52 (0.38 - 0.79)  |

Data are proportions or median (1<sup>st</sup>-3<sup>rd</sup> quartile). ALAT: alanine aminotransferase, ASAT: aspartate aminotransferase, BMI: body mass index, GGT: gamma-glutamyltransferase. \*Some subjects harbored multiple multiple pathologies leading to exclusion. \*\*defined as either intrahepatic cholestasis, liver cirrhosis or previous acute or chronic hepatitis

**Suppl. Table 2:** Results from multivariable quantile regression models assessing the effects of sex, age, BMI and ALAT on median native and secretin-stimulated CBD and PD diameters.  $\beta$ -coefficients with 95% confidence intervals (CI) and p-values for an increase in one year (age), one kg/m<sup>2</sup> (BMI) and 0.1  $\mu$ katal/l are given.

| Outcome             | Exposure                            | $\beta$ (95% CI)        | p      |
|---------------------|-------------------------------------|-------------------------|--------|
| <b>CBD native</b>   | sex (male vs female)                | 0.691 (0.438; 0.943)    | < .001 |
|                     | age (increase 1 year)               | 0.042 (0.034; 0.050)    | < .001 |
|                     | BMI (increase 1 kg/m <sup>2</sup> ) | -0.023 (-0.044; -0.003) | .028   |
|                     | ALAT (increase 0.1 $\mu$ katal/l)   | 0.015 (-0.040; 0.069)   | .602   |
| <b>CBD secretin</b> | sex (male vs female)                | 0.791 (0.545; 1.036)    | < .001 |
|                     | age (increase 1 year)               | 0.046 (0.038; 0.055)    | < .001 |
|                     | BMI (increase 1 kg/m <sup>2</sup> ) | -0.017 (-0.044; 0.009)  | .195   |
|                     | ALAT (increase 0.1 $\mu$ katal/l)   | 0.021 (-0.033; 0.075)   | .451   |
| <b>PD native</b>    | sex (male vs female)                | -0.042 (-0.146; 0.062)  | .425   |
|                     | age (increase 1 year)               | 0.022 (0.018; 0.026)    | < .001 |
|                     | BMI (increase 1 kg/m <sup>2</sup> ) | -0.018 (-0.029; -0.006) | < .01  |
|                     | ALAT (increase 0.1 $\mu$ katal/l)   | 0.033 (0.011; 0.055)    | < .01  |
| <b>PD secretin</b>  | sex (male vs female)                | 0.094 (-0.039; 0.226)   | .167   |
|                     | age (increase 1 year)               | 0.024 (0.020; 0.029)    | < .001 |
|                     | BMI (increase 1 kg/m <sup>2</sup> ) | -0.019 (-0.033; -0.005) | < .01  |
|                     | ALAT (increase 0.1 $\mu$ katal/l)   | 0.018 (-0.019; 0.054)   | .348   |

CBD, common bile duct; PD, pancreatic duct; BMI, body mass index, ALAT, alanin aminotransferase



**Suppl. Table 3:** Upper reference limits for common bile duct (CBD) and pancreatic duct (PD) diameters in healthy subjects according to age in decades and administration of secretin

| Age group, years | CBD    |          | PD     |          |
|------------------|--------|----------|--------|----------|
|                  | native | secretin | native | secretin |
| <30              | 6.3    | 6.0      | 2.6    | 2.7      |
| 30-39            | 7.2    | 6.9      | 2.9    | 3.1      |
| 40-49            | 8.1    | 7.8      | 3.2    | 3.5      |
| 50-59            | 9.0    | 8.7      | 3.5    | 3.9      |
| 60-69            | 9.9    | 9.6      | 3.8    | 4.3      |
| ≥70              | 11.4   | 11.0     | 4.3    | 4.8      |

CBD: common bile duct, CCE: cholecystectomy, PD: pancreatic duct.

**Suppl. Table 4:** Sensitivity analysis - upper reference limits for common bile duct (CBD) and pancreatic duct (PD) diameters according to age, administration of secretin and cholecystectomy status (CCE).

| <b>CBD</b> |         | <b>Upper limits of normal</b> |            |            |
|------------|---------|-------------------------------|------------|------------|
|            |         | All ages                      | < 65 years | ≥ 65 years |
| native     | Healthy | 9.1                           | 8.0        | 10.9       |
|            | CCE     | 13.5                          | 13.3       | 14.0       |
| secretin   | Healthy | 8.8                           | 7.6        | 10.8       |
|            | CCE     | 13.0                          | 13.0       | 12.6       |
| <b>PD</b>  |         |                               |            |            |
| native     | Healthy | 3.6                           | 3.2        | 4.2        |
|            | CCE     | 3.8                           | 3.8        | 3.9        |
| secretin   | Healthy | 3.8                           | 3.4        | 4.5        |
|            | CCE     | 4.0                           | 3.5        | 4.0        |

CBD: common bile duct, CCE: cholecystectomy, PD: pancreatic duct.

**Suppl. Table 5:** Inter- and intra-rater reliability

| Reliability statistics                     | Inter-rater reliability of FK and PT |                       | Intra-reader reliability of FK |
|--------------------------------------------|--------------------------------------|-----------------------|--------------------------------|
|                                            | CBD                                  | PD                    |                                |
| Cronbach's Alpha                           | 0.954                                | 0.983                 | 0.939                          |
| Cronbach's Alpha<br>for standardized items | 0.954                                | 0.984                 | 0.939                          |
| Number of items                            | 2                                    | 2                     | 2                              |
| Intra-class correlation (95 % CI)          |                                      |                       |                                |
| single                                     | 0.912 (0.846 - 0.950)                | 0.967 (0.943 - 0.981) | 0.884 (0.805 - 0.933)          |
| mean                                       | 0.954 (0.917 - 0.975)                | 0.983 (0.970 - 0.990) | 0.939 (0.892 - 0.965)          |

CI: confidence interval; CBD; common bile duct; PD: pancreatic duct

**Suppl. Table 6:** Overview on previous cohort studies

| Study author                  | Modality | N    | Median Age | CBD in mm         | PD in mm | Increase with age | Increase with CCE | New reference limit                    |
|-------------------------------|----------|------|------------|-------------------|----------|-------------------|-------------------|----------------------------------------|
| Govindan et al (2021) [12]    | MRCP     | 517  | 54.6       | 5.4±1.4           | /        |                   |                   | 8 mm                                   |
| Karamanos et al. (2016) [13]  | MRCP/ERP | 1000 | 40.7       | 1.5-16.4          | /        |                   |                   | /                                      |
| Peng et al. (2015) [14]       | MRCP     | 862  | 46.10      | 4.13±1.11         | /        |                   | /                 | /                                      |
| McArthur et al. (2014) [15]   | CT       | 304  | 51.9       | 5.07              | /        |                   |                   | /                                      |
| Benjaminov et al. (2013) [16] | EUS      | 647  | 60.8       | 4.4-6.0           | /        |                   |                   | /                                      |
| Chen et al. (2012) [17]       | MRCP     | 187  | 51         | 4.6±1.8           | /        |                   | /                 | /                                      |
| Itoi et al. (2012) [18]       | US       | 8840 | 51.6       | 4.5 ±1.4          | /        |                   | /                 | 2.83 + 0.03 x age                      |
| Senturk et al. (2012) [19]    | CT       | 604  | 49.2       | 4.77±1.81         | /        |                   |                   | 8mm for age > 50 years, 10 mm post-CCE |
| McArthur et al. (2012) [20]   | US       | 720  | 50.9       | 3.5, post-CCE 4.5 | /        |                   |                   |                                        |
| Park et al. (2009) [21]       | CT       | 398  | 54.4       | 6.70±2.41         | /        |                   | /                 | 7mm for age > 50 years                 |
| Chawla et al. (2009) [22]     | CT       | 80   | 53         | 5.2, post-CCE 6.9 | /        |                   |                   | /                                      |
| Bachar et al. (2003) [23]     | US       | 251  | 52.5       | 4.28±1.18         | /        |                   | /                 | 8,5 mm in elderly                      |
| Horrow et al. (2001) [24]     | US       | 258  | 55         | 3.5±1.2           | /        |                   | /                 | /                                      |
| Kaim et al. (1998) [25]       | US       | 92   | 84.7       | 6.2, post-CCE 8.7 | /        |                   |                   | 10mm for age > 75 years, post-CCE 14mm |
| Feng und Song                 | US       | 234  | /          | 5.9, post-CCE 6.1 | /        | /                 |                   | /                                      |

|                                   |      |                      |            |           |             |                |   |                           |
|-----------------------------------|------|----------------------|------------|-----------|-------------|----------------|---|---------------------------|
| (1994) [26]                       |      |                      |            |           |             |                |   |                           |
| Wu, Ho und Chen (1984) [27]       | US   | 203                  | 21 to 60   | 3.3 – 6.8 | /           |                | / | /                         |
| Niederrau et al. (1983) [28]      | US   | 830                  | /          | 2.8 ±2    | /           |                | / | /                         |
|                                   |      |                      |            |           |             |                |   |                           |
| Frøkjær et al. (2020) [29]        | MRCP | 262                  | 52.7       |           | 2 – 3 mm    |                | / | 2.7 mm for age > 60 years |
| Wang et al. (2019) [30]           | MRCP | 280                  | 54.4       |           | 1.99±0.53   |                | / | /                         |
| Testoni et al. (2009) [31]        | MRCP | 25                   | 57.8       | /         | 1.1±0.6     | /              | / | /                         |
| Glaser und Stienecker (1999) [32] | US   | 131                  | 52         | /         | 1.9         |                | / | /                         |
| Hastier et al. (1998) [33]        | ERCP | 155                  | >70 vs <50 | /         | 5.3 vs. 3.3 |                | / | /                         |
| Anand et al. (1989) [34]          | ERCP | 55                   | 36.9       | /         | 3.3±0.91    |                | / | /                         |
| Bolondi et al. (1984) [35]        | US   | 18                   | 26         | /         | 1.2±0.4     |                | / | /                         |
| Sivak und Sullivan (1976) [36]    | ERCP | 35                   |            | /         | 3.2±0.1     |                | / | /                         |
|                                   |      | positive association |            |           |             | / not assessed |   |                           |
|                                   |      | no association       |            |           |             |                |   |                           |

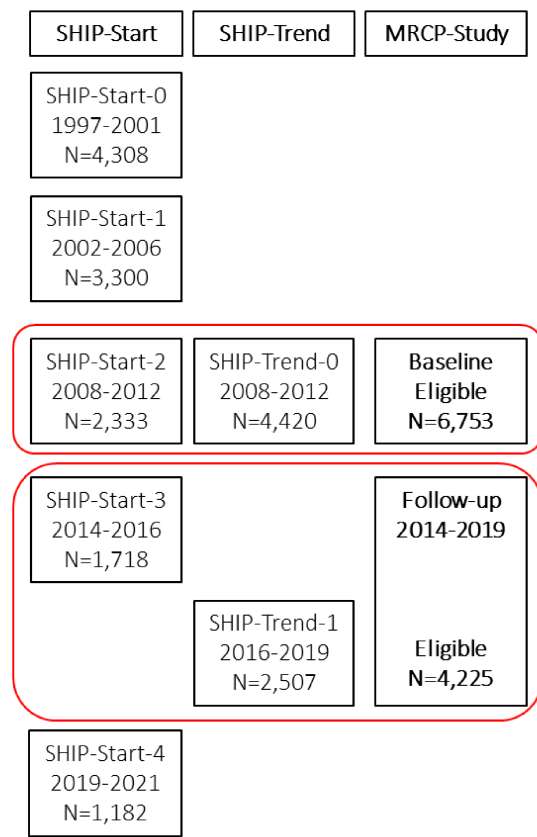

**Suppl. Figure 1.** Flow-chart and time line of the SHIP study cohorts from which the data included in the current analysis has been extracted.

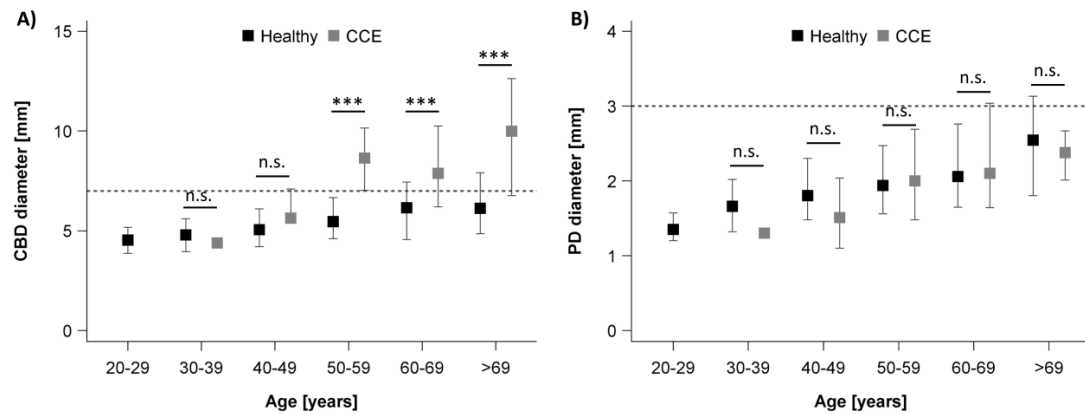

**Suppl. Figure 2.** Median native duct diameters with 1.-3. quartile by age decade in healthy subjects and in subjects with cholecystectomy (CCE). The horizontal dotted line represents the conventional upper limit of normal of 7 mm and 3 mm for the respective duct. A) The diameter of the common bile duct (CBD) increases with age. CCE leads to a further increase in the diameter of the CBD. B) The diameter of the pancreatic duct (PD) increases with age. CCE has no impact on the diameter of the PD. Group differences between healthy subjects and those with CCE were tested with Wilcoxon-Mann Whitney tests. \*\*\*  $p < .001$

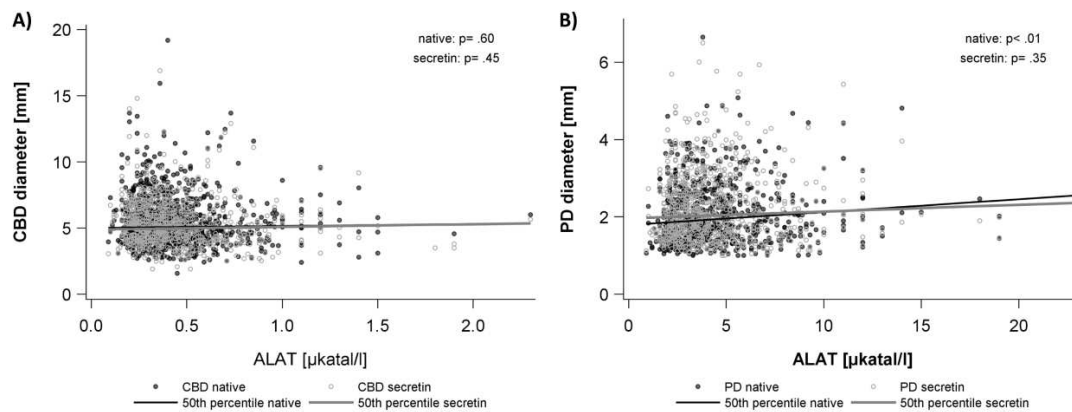

**Suppl. Figure 3.** Scatterplot of the largest perpendicular diameter of (A) the common bile duct (CBD) and (B) the pancreatic duct (PD) according to alanine aminotransferase (ALAT) in healthy subjects. Solid lines represent the estimated 50th percentile as estimated from quantile regression models adjusted for sex, age and body mass index. Black dots and lines represent native duct diameters, grey dots and lines represent duct diameters after secretin administration on magnetic resonance cholangiopancreatography.



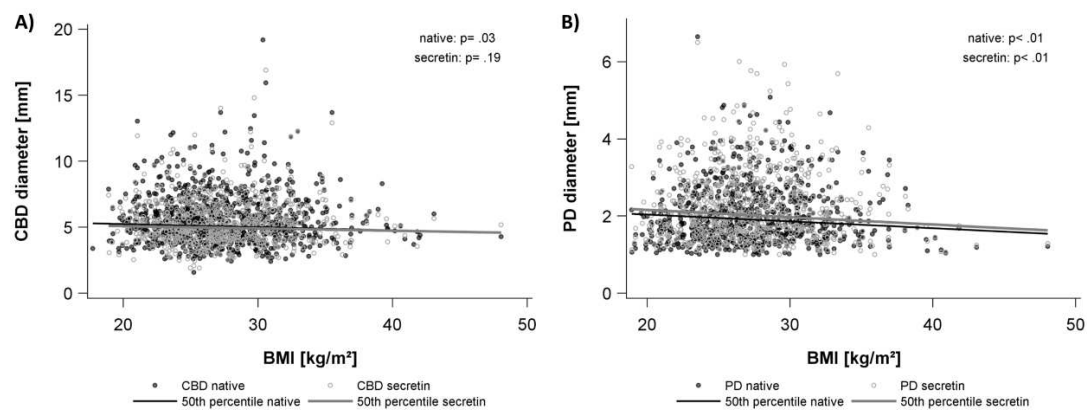

**Suppl. Figure 4.** Scatterplot of the largest perpendicular diameter of (A) the common bile duct (CBD) and (B) the pancreatic duct (PD) according to body mass index (BMI) in healthy subjects. Solid lines represent the estimated 50th percentile as estimated from quantile regression models adjusted for sex, age and alanine aminotransferase. Black dots and lines represent native duct diameters, grey dots and lines represent duct diameters after secretin administration on magnetic resonance cholangiopancreatography.
